# Supplementary material for: Serum miR-200c-3p and -6134 as Biomarkers for Epithelial Ovarian Cancer: A Comprehensive analsis with CA125
Source: Research Square preprint supplement (doi:10.21203/rs.3.rs-6223812/v1), 2025-04-01
Supplement: Supplementary file 1 [file 230388b2b8077aa6304d3cf7.xlsx]

## Sheet: Sheet2
Table S2 Analysis of Akaike Information Criterion for serum miRNAs and IL-6 as their variable combinations in patients between benign tumor vs. EOC with CA125 values using a threshold of 35 units/mL.
Combinations			AIC
CA125≧35
miR-200c-3p	miR-6134	IL-6	63
miR-200c-3p	miR-6134		61
miR-6134	IL-6		65
miR-200c-3p	IL-6		97
CA125<35
miR-200c-3p	miR-6134	IL-6	46
miR-200c-3p	miR-6134		44
miR-6134	IL-6		47
miR-200c-3p	IL-6		79
Footnote: AIC, Akaike Information Criterion; CA125, cancer antigen 125; EOC, epithelial ovarian cancer; IL-6, interleukin-6; miRNA, microRNA
