# Supplementary material for: Serum miR-200c-3p and -6134 as Biomarkers for Epithelial Ovarian Cancer: A Comprehensive analsis with CA125
Source: Research Square preprint supplement (doi:10.21203/rs.3.rs-6223812/v1), 2025-04-01
Supplement: Supplementary file 2 [file c7338ec5781ad64ecba06dc2.xlsx]

## Sheet: Sheet1
Table S1 Analysis of Akaike Information Criterion with miRNAs, CA125, HE4 and IL-6 in the serum as screening markers and their variable combinations in patients with EOC
Combinations					AIC
Normal vs EOC
miR6134	CA125	HE4			67.644
miR200c	miR6134	CA125	HE4		69.107
miR6134	CA125	IL6	HE4		69.535
miR6134	HE4				69.758
miR200c	miR6134	HE4			70.364
miR200c	miR6134	CA125	IL6	HE4	71.065
Benign vs EOC
miR6134	CA125	IL6	HE4		88.614
miR200c	miR6134	CA125	IL6	HE4	88.881
miR200c	miR6134	IL6	HE4		89.779
miR6134	CA125	HE4			90.265
miR6134	IL6	HE4			90.692
miR200c	miR6134	CA125	HE4		91.202
Footnote: AIC, Akaike Information Criterion; CA125, cancer antigen 125; HE4, human epididymis protein 4; EOC, epithelial ovarian cancer; IL-6, interleukin-6; miRNA, microRNA
