# Supplementary material for: Serum miR-200c-3p and -6134 as Biomarkers for Epithelial Ovarian Cancer: A Comprehensive analsis with CA125
Source: Research Square preprint supplement (doi:10.21203/rs.3.rs-6223812/v1), 2025-04-01
Supplement: Supplementary file 3 [file f060dddddc04eeab95c1bcb5.docx]

MicroRNA expression in cultured cell lines

*Cell culture*

Five human ovarian cancer cell lines (RMG-1, RMuG-S, ES-2, OVCaR-3, and JHOC5), seven human cervical cancer cell lines (C33a, SiHa, HeLa, CaSki, HT-3, ME-180, and C-4I), two uterine cancer cell lines (Heck-Ib and Ishikawa), two breast cancer cell lines (MDA-MB231 and MCF7), and colorectal adenocarcinoma (COLO201) and squamous carcinoma (A431) cell lines were obtained from Keio University, Japan (RMG-1, RMuG-S, ES-2, OVCaR-3, JHOC5, C33a, SiHa, HeLa, Heck-Ib and Ishikawa), the American Type Culture Collection (Manassas, VA, USA; CaSki, HT-3, ME-180, C-4I, MDA-MB231, and MCF7) or Japanese Collection of Research Bioresources Cell Bank (COLO201 and A431, the National Institute of Biomedical Innovation, Health, and Nutrition, Osaka, Japan). Short terminal repeat genotyping was employed to confirm the identities of the analyzed cell lines obtained from Keio University, revealing a match of over 80% with tested markers. The human cancer cell lines were cultured in culture media appropriate for each cell line, supplemented with 10% fetal bovine serum (Thermo Fisher Scientific, Waltham, MA, USA), 10 μg/mL penicillin, and 10 μg/mL streptomycin (Wako, Amagasaki, Japan). Throughout all experiments, cells were incubated at 37°C in 5% CO2. Our experiments were conducted on cultures that had reached 70% confluence.

*Real-time RT-PCR for miRNA quantification*

Cells were lysed directly within each T25 cell culture flask using 1 mL of QIAzol Lysis Reagent, followed by total RNA extraction using an miRNeasy Mini Kit (QIAGEN GmbH, Hilden, Germany). Cellular micro (mi)RNA was measured using real-time reverse transcription (RT)-PCR following the same protocol as tissue measurements. MicroRNA levels were normalized against a combination of the average signal of both RNU48 and RNU44 cells and presented as −ΔCt values. The expression level in A451 cells was set to 1, and the relative expression levels in each cell line were calculated accordingly.


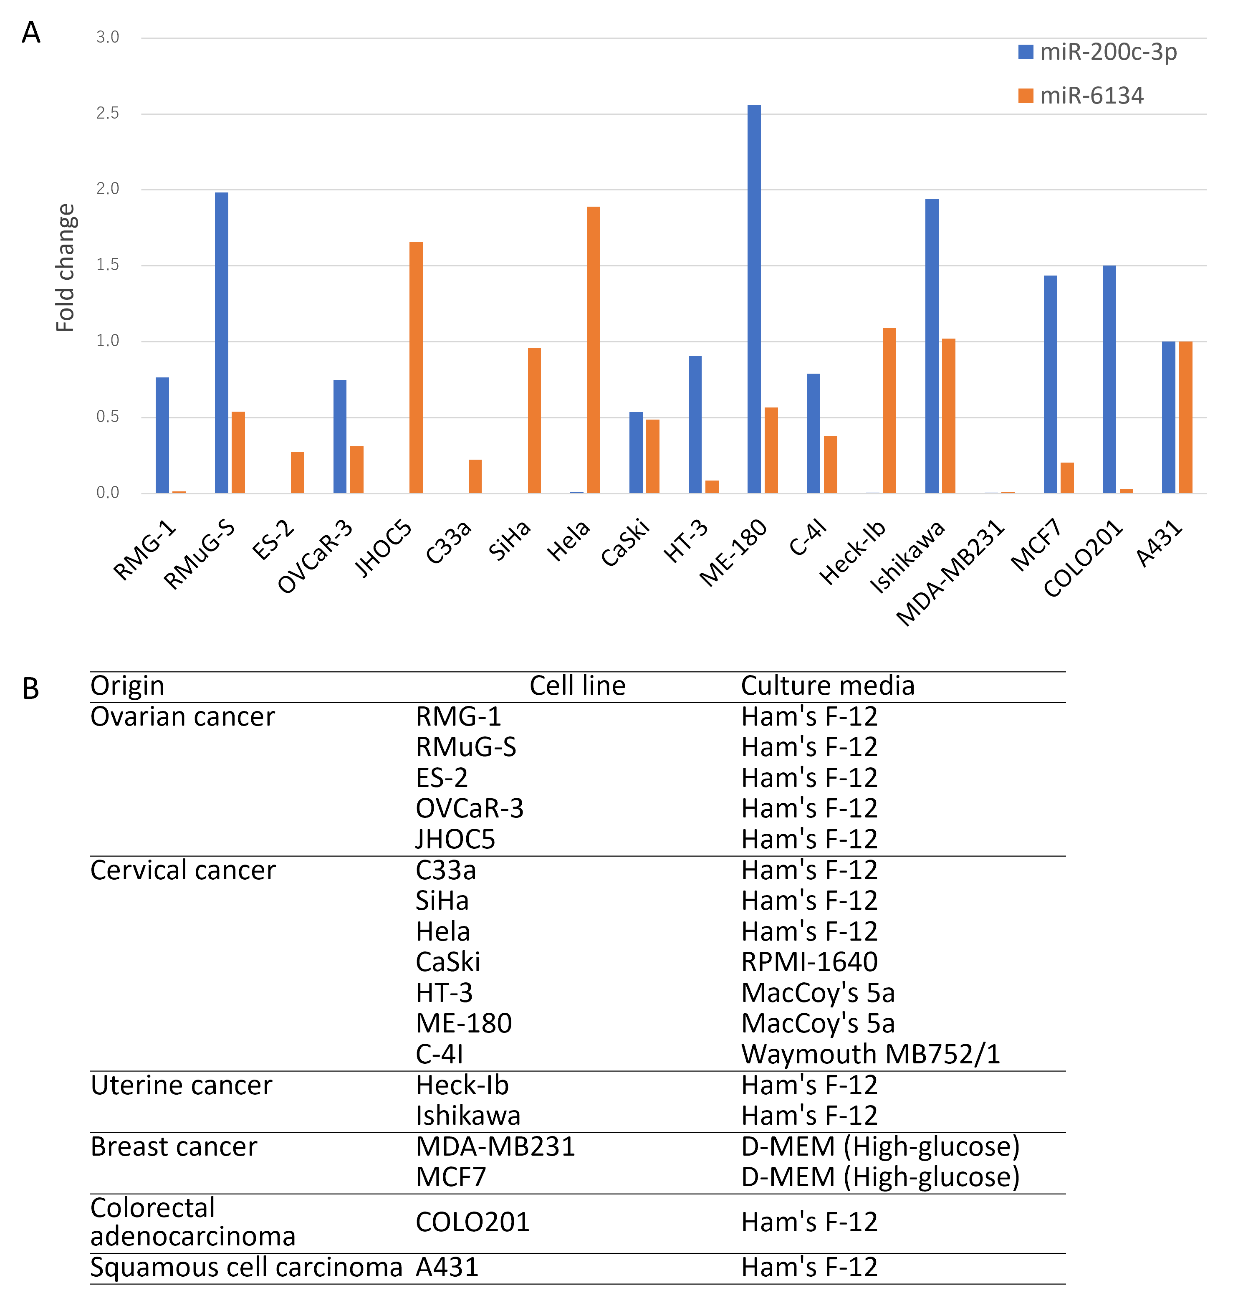


Figure S1. The expression levels of miR-200c-3p and -6134 in cultured cell lines. (A) Bar graphs show the relative expression levels of miR-200c-3p and -6134 in each cultured cell line, normalized to the expression level of A451, which is set to 1. (B) List of cancer cell lines. miRNA, microRNA
